# Supplementary material for: Clinical features of bonding disorders in Japanese mothers derived from the Stafford Interview
Source: Research Square preprint supplement (doi:10.21203/rs.3.rs-3680723/v1), 2023-12-04
Supplement: Supplementary file 1 [file 42fdfc3904990081eb959e95.docx]

Supplemental file

Table 1. Interview results in pregnancy *RESPONSE TO CONCEPTION*

|  |  | *ER/PA* | *MD/PA 1-3* | *NB/IFA* | *MD 1-8* |
| --- | --- | --- | --- | --- | --- |
| *№.* | *Items of the Interview* | *Score: Participants’ response* | *Score: Participants’ response* | *Score: Participants’ response* | *Score: Participants’ response* |
| *3* | Planning of pregnancy | 4: not planned, not intended, not  welcomed | 2: not planned without  contraceptives (MD/PA1)  0: strongly desired and  planned (MD/PA2,3) | 4: not planned, not welcomed | 4: not planned, inconvenient,  unwelcome (MD1)  3: not planned, ambivalent (MD3)  2: not planned, but welcomed (MD2,4) 1: planned (MD5-7) 0: strongly desired (MD8) |
| *4* | Unacknowledged pregnancy | 0: did not deny the pregnancy | 0: did not deny the pregnancy  (MD/PA1-3) | 3: denial of pregnancy for 6  months | 0: didn't deny the pregnancy (MD1-8) |
| *5* | Mother's reaction to conception | 4: despair | 1: pleased (MD/PA1,2) 0: strongly positive (MD/PA3) | 4: strongly negative, panic | 3: inconvenience (MD1) 2: pleased, but didn't want to have a baby (MD3) 2: no feelings, not real (MD4)  1: pleased (MD2,5,6) 0: strongly positive (MD7, MD8) |
| *6* | Reaction of baby's father to pregnancy | 2: indifferent | 1: pleased (MD/PA1,2) 0: strongly positive (MD/PA3) | 1: pleased | 2: equanimity, pleased faintly (MD3)  1: pleased (MD1,2,5,6) 0: strongly positive (MD4,7,8) |
| *7* | Response of other important persons to pregnancy | 0: the pregnant woman was  Pleased | 1: pregnant woman’s mother  was pleased (MD/PA1,2) 0: pregnant woman’s parents  were strongly positive  (MD/PA3) | 8: told no one about the  pregnancy | 3**:** mother-in-law was critical (MD3)  2: own mother was surprised, concerned, little  happy (MD2), pleased but complained bitterly  (MD3)  1: parents and sisters were pleased (MD1,4,8) 0: very pleased (parents, families) (MD5,6,7,8) |
| *8* | Ideas about termination | 2: the mother explored ways for  an abortion, but couldn't  action it | 4: planned termination, but  changed her mind (MD/PA1) 0: no ideas about termination  (MD/PA2,3) | 2: had a secret wish for  termination | 3: termination was the mother's preference but  was refused by her husband (MD1) 1: under pressure from the mother-in-law to  terminate, but refused (MD3)  0: no ideas about termination (MD2,4,5,6,7,8) |

*ERPA: Emotional Rejection and mild Pathological anger, MD/PA: Mild disorder and Pathological anger, NB/IFA: Normal Bonding and Infant focused anxiety, MD: Mild disorder*

Supplemental file

Table 2. Interview results in pregnancy WELLBEING *OF THE UNBORN CHILD*

|  |  | *ER/PA* | *MD/PA 1-3* | *NB/IFA* | *MD 1-8* |
| --- | --- | --- | --- | --- | --- |
| *№.* | *Items of the Interview* | *Score: Participants’ response* | *Score: Participants’ response* | *Score: Participants’ response* | *Score: Participants’ response* |
| *34* | Medical concern about the unborn child | 0: no problem | 0: no problem (MD/PA1-3) | 0: no problem | 1: some concerns because of the mother’s  chronic physical disease (MD6)  0: no problem (MD1, 2,3,5,7,8) |
| *35* | Social concern about the unborn child | 1: a bit of DV from husband,  no social services support | 1: financial problems (MD/PA1)  1: abuse from her own parent (MD/PA3)  0: no problem (MD/PA2) | 1: health workers already  involved, no child  protection service | 1: mother's health/financial concerns/lack of  people to help with baby care (MD1-4,7) 0: no problem (MD5,6,8) |
| *36* | Attitude to the gender of the unborn child | 0: gender is not an issue | 0: Gender is not an issue (MD/PA1-3) | 0: gender is not an issue | 1: worried about having a baby girl (MD1) 0: gender is not an issue (MD2-8) |
| *37* | Interaction with the foetus | 3: no interaction | 1: talks to the foetus, and rubs her tummy  (MD/PA1)  0: the mother and her husband  interact with the foetus (MD/PA2,3) | 2: little interaction,  but minimal | 2: minimal interaction (MD3,7) 1: talks to the infant (MD6)  0: the mother and her husband interacted with  infants (MD1,2, 4,5,8) |
| *38* | Practical preparations for the newborn | 1: sufficient | 1: sufficient practical preparations  (MD/PA1-3) | 1: sufficient practical  preparations | 3: no practical preparations (MD3, 6) 2: inadequate (MD7)  1: sufficient preparations (MD1,2,4,5,8) |
| *39* | Mental and emotional readiness | 3: unacceptable, didn't know  how to go on living | 1: imagines fun but also worries a lot  (MDPA2)  1: looks forward with pleasure (MD/PA3)  0: spends a lot of time imagining a happy  life with her newborn (MD/PA1) | 1: imagines very little fun and  a lot of worry | 2: does not think about the baby (MD4,6)  1: looks forward with pleasure (MD1-3) 1: imagines with pleasure, worries a lot  (MD5,7) 0: intensely occupied with fantasies (MD8) |
| *40* | Foetal abuse | 0: no harm to the baby | 0: no foetal abuse (MD/PA1-3) | 0: no foetal abuse | 0: no foetal abuse (MD1-8) |

*ERPA: Emotional Rejection and mild Pathological anger, MD/PA: Mild disorder and Pathological anger, NB/IFA: Normal Bonding and Infant focused anxiety, MD: Mild disorder*

*DV: Domestic Violence*

Supplemental file

Table 3. Interview results postnatally INFANT *CHARACTERISTICS AND MATERNAL INVOLVEMENT IN CARE*

|  |  | *ER/PA* | *MD/PA 1-3* | *NB/IFA* | *MD 1-8* |
| --- | --- | --- | --- | --- | --- |
| *№.* | *Items of the Interview* | *Score: Participants’ response* | *Score: Participants’ response* | *Score: Participants’ response* | *Score: Participants’ response* |
| *158* | Baby's temperament | 0: cries at night, but easy to  Soothe | 3: difficult baby (MD/PA3)  2: screams a lot, can be pacified (MD/PA1) 0: easy baby (MD/PA2) | 2: screams a lot, but can be  pacified | 2: screams a lot but can be pacified (MD2) 1: some difficulties, wakeful at night, cries a  lot, but easy to soothe (MD5,7,8)  0: cries but easy to soothe (MD1,3,4,6) |
| *159* | Other problems with baby | 1: a slightly high muscle tone,  baby eczema | 1: feeding problems, eczema, colic,  suspected hearing impairment lack of  weight gain, or nappy rash (MD/PA1-3) | 0: no problems | 0: no problems (MD1,4,6,7) 1: cries at night, feeding problems, sleep all  day, eczema (MD2,3,5,8) |
| *160* | Infant development | 1: normal | 1: normal (MD/PA1-3) | 1: normal | 1: normal (MD1- 8) |
| *161* | Mother's involvement in infant care | 2: shared the baby's care with  her own mother | 2: shared baby care with her mother  (MD/PA1) 0: participants did babycare (MD/PA2,3) | 0: mother does most of the  baby care | 2: shares the baby care with her husband or  other family members (MD1,3,4,6)  0: normal involvement (MD2,5,7,8) |
| *162* | Mother's emotional over-involvement | 0: no over-involvement | 2: sometimes gives up her meal to  meet her baby's needs (MD/PA1,3)  0: no over-involvement (MD/PA2) | 0: no over-involvement | 0: no over-involvement (MD1-8) |
| *163* | Quality of emotional involvement | 3: a complete lack of  affectionate involvement | 0: enjoys a cuddle or enjoys interacting  when the baby is sleeping (MD/PA1-3) | 1: lack of cuddling, puts the  baby in a cradle to prevent  crying | 1: a little enjoyment (MD1,4) 0: enjoy playing and interacting with the baby  (MD2,3,5,6,7,8) |

*ERPA: Emotional Rejection and mild Pathological anger, MD/PA: Mild disorder and Pathological anger, NB/IFA: Normal Bonding and Infant focused anxiety, MD: Mild disorder*

Supplemental file

Table 4. Interview results postnatally MOTHER’S *EMOTIONAL RESPONSE TO HER INFANT*

|  |  | *ER/PA* | *MD/PA 1-3* | *NB/IFA* | *MD 1-8* |
| --- | --- | --- | --- | --- | --- |
| *№.* | *Items of the Interview* | *Score: Participants’ response* | *Score: Participants’ response* | *Score: Participants’ response* | *Score: Participants’ response* |
| *164* | Timing of positive feelings for baby | 3 weeks after birth | before delivery (MD/PA1)  just after birth (MD/PA2)  2–3 weeks after birth (MD/PA3) | just after birth | before delivery (MD1,3,5,6,7,8)  just after birth (MD2)  2 weeks after birth (MD3)  1 month after birth (MD4) |
| *165* | Feeling of estrangement | 1: felt the baby was like an  'alien' | 2: feeling of estrangement (MD/PA2)  0: no feeling of estrangement (MD/PA1,3) | 0: no estrangement (0) | 1: estrangement for a short time, until 1 month  or 1 week postpartum (MD2-7)  0: no feeling of estrangement (MD1,8) |
| *166* | Nature and strength of feelings for infant (historic) | 5: hatred and rejection toward  the baby | 4: hostility w/o positive feelings during  three weeks after birth (MD/PA3)  2: positive feelings and anger (MD/PA1,2) | 2: felt positive, anxiety, and  desired to give up baby care  three times | 2: equivocal or ambivalent (MD1-8) |
| *167* | Nature and strength of feelings for infant (present) | 5: hatred and rejection toward  the baby | 2: positive feelings and anger,  estrangement (MD/PA1-3) | 2: felt positive and negative  anxiety when left alone with  her infant | 2: equivocal or ambivalent (MD1,2,4,5) 1: positive (MD3,6,8) |
| *168* | Ideas of transferring care or escaping from maternal duties | 5: desire for long-term  fostering/adoption | 2: temporary thoughts about transferring  baby care to others, but didn't (MD/PA3)  0: no thoughts to transfer, but felt trapped  due to baby care (MD/PA1,2) | 3: ideas of transferring care  were discussed with social  services | 4: transferring care to others for short times  (MD2,4,5)  0: no thoughts to transfer (MD1,3,6,7,8) |
| *169* | Fantasies of infant loss | 1: wished something had  happened to the baby to  make it disappear | 0: no such ideas (MD/PA1-3) | 0: no such ideas | 0: no such ideas (MD1-8) |

*ERPA: Emotional Rejection and mild Pathological anger, MD/PA: Mild disorder and Pathological anger, NB/IFA: Normal Bonding and Infant focused anxiety, MD: Mild disorder*

Supplemental file

Table 5. Interview results postnatally ANGER *AND ABUSE*

|  |  | *ER/PA* | *MD/PA 1-3* | *NB/IFA* | *MD 1-8* |
| --- | --- | --- | --- | --- | --- |
| *№.* | *Items of the Interview* | *Score: Participants’ response* | *Score: Participants’ response* | *Score: Participants’ response* | *Score: Participants’ response* |
| *170* | Angry response to infant | 4: lost control, screaming at  the baby | 5: smacked the baby or covered the baby's  mouth twice (MD/PA2,3)  4: lost control, screaming at the baby  (MD/PA1) | 0: no anger | 3: anger is controlled but difficult (MD2,7) 1: felt angry with her baby (MD1,8)  0: no anger (MD3,4,6) |
| *171* | Frequency of maternal anger | 3: most of the time | 3: most of the time (MD/PA1) 2: often (MD/PA2,3) | 0: never | 2: often (MD1,2,7,8) 0: never (MD3,4,6) |
| *172* | Coping with maternal anger | 2: leaving the baby crying and  drinking coffee | 3: no strategy (MD/PA2,3)  1: transfer care to the grandmother  (MD/PA1) | 0: no anger | 3: no strategy (MD1) 2**:** leave the infant crying (MD3,4,6)  1: transfer care to others (MD2,8)  0: no anger (MD3,4,6) |
| *173* | Child abuse | 0: abuse has not occurred | 3: twice (MD/PA3)  2: has occurred once (MD/PA2) 0: abuse has not occurred (MD/PA1) | 0: no abuse | 0: no abuse (MD1-8) |
| *174* | Child neglect | 0: no neglect | 0: no neglect (MD/PA1-3) | 0: no neglect | 0: no neglect (MD1-8) |
| *175* | Filicidal impulses | 1: filicidal ideas occasionally | 0: no ideas of killing the baby (MD/PA1-3) | 0: no ideas of killing the baby | 0: no ideas of killing the baby (MD1-8) |

*ERPA: Emotional Rejection and mild Pathological anger, MD/PA: Mild disorder and Pathological anger, NB/IFA: Normal Bonding and Infant focused anxiety, MD: Mild disorder*
